# Supplementary material for: Pregnant Women’s Perceptions of the Risks and Benefits of Disclosure During Web-Based Mental Health E-Screening Versus Paper-Based Screening: Randomized Controlled Trial
Source: PubMed Central journal article supplement (PMC5670313; doi:10.2196/mental.6888), 2017-10-20
Supplement: mental_v4i4e42_app1.pdf [file mental_v4i4e42_app1.pdf]

Appendix 1. Risks and benefits of disclosure of paper-based versus e-screening (N=631).

| Disclosure Expectations<br>Scale items <sup>a</sup>                                                                                                                  |            | Full<br>sample<br>(N=631 <sup>b</sup> )<br>N (%) | Group 1<br>Paper-based<br>screening<br>(n=329)<br>n (%) | Group 2<br>E-screening<br>(n=302)<br>n (%) | X <sup>2</sup> (degrees of<br>freedom) | P value <sup>b</sup> |
|----------------------------------------------------------------------------------------------------------------------------------------------------------------------|------------|--------------------------------------------------|---------------------------------------------------------|--------------------------------------------|----------------------------------------|----------------------|
| <b>1. How difficult would it be<br/>for you to disclose personal<br/>information to a doctor or<br/>nurse?</b>                                                       |            |                                                  |                                                         |                                            |                                        |                      |
|                                                                                                                                                                      | Not at all | 323<br>(51.2)                                    | 171 (52.0)                                              | 152 (50.3)                                 | 2.2 <sub>4</sub>                       | .70                  |
|                                                                                                                                                                      | Slightly   | 172<br>(27.3)                                    | 89 (27.1)                                               | 83 (27.5)                                  |                                        |                      |
|                                                                                                                                                                      | Somewhat   | 84 (13.3)                                        | 44 (13.4)                                               | 40 (13.2)                                  |                                        |                      |
|                                                                                                                                                                      | Moderately | 45 (7.1)                                         | 20 (6.1)                                                | 25 (8.3)                                   |                                        |                      |
|                                                                                                                                                                      | Very       | 7 (1.1)                                          | 5 (1.5)                                                 | 2 (0.7)                                    |                                        |                      |
| <b>2. How vulnerable would<br/>you feel if you disclosed<br/>something very personal to<br/>your doctor or nurse that<br/>you have never told anyone<br/>before?</b> |            |                                                  |                                                         |                                            |                                        |                      |
|                                                                                                                                                                      | Not at all | 154                                              | 76 (23.1)                                               | 78 (25.8)                                  | 2.4 <sub>4</sub>                       | .66                  |

|                                                                                                |            |               |            |            |                  |     |
|------------------------------------------------------------------------------------------------|------------|---------------|------------|------------|------------------|-----|
|                                                                                                |            | (24.4)        |            |            |                  |     |
|                                                                                                | Slightly   | 205<br>(32.5) | 109 (33.1) | 96 (31.8)  |                  |     |
|                                                                                                | Somewhat   | 125<br>(19.8) | 67 (20.4)  | 58 (19.2)  |                  |     |
|                                                                                                | Moderately | 86 (13.6)     | 49 (14.9)  | 37 (12.3)  |                  |     |
|                                                                                                | Very       | 61 (9.7)      | 28 (8.5)   | 33 (10.9)  |                  |     |
| <b>3. How beneficial would it be for you to talk about the problem with a doctor or nurse?</b> |            |               |            |            |                  |     |
|                                                                                                | Not at all | 39 (6.2)      | 21 (6.4)   | 18 (6.0)   | 2.2 <sub>4</sub> | .69 |
|                                                                                                | Slightly   | 73 (11.6)     | 40 (12.2)  | 33 (10.9)  |                  |     |
|                                                                                                | Somewhat   | 120<br>(19.0) | 66 (20.1)  | 54 (17.9)  |                  |     |
|                                                                                                | Moderately | 167<br>(26.5) | 90 (27.4)  | 77 (25.5)  |                  |     |
|                                                                                                | Very       | 232<br>(36.8) | 112 (34.0) | 120 (39.7) |                  |     |
| <b>4. How risky would it feel to disclose your hidden feelings to a doctor or nurse?</b>       |            |               |            |            |                  |     |
|                                                                                                | Not at all | 251<br>(39.8) | 127 (38.6) | 124 (41.1) | 2.5 <sub>4</sub> | .64 |

|                                                                                                             |            |               |            |            |                  |     |
|-------------------------------------------------------------------------------------------------------------|------------|---------------|------------|------------|------------------|-----|
|                                                                                                             | Slightly   | 160<br>(25.4) | 86 (26.1)  | 74 (24.5)  |                  |     |
|                                                                                                             | Somewhat   | 117<br>(18.5) | 65 (19.8)  | 52 (17.2)  |                  |     |
|                                                                                                             | Moderately | 87 (13.8)     | 41 (12.5)  | 46 (15.2)  |                  |     |
|                                                                                                             | Very       | 16 (2.5)      | 10 (3.0)   | 6 (2.0)    |                  |     |
| <b>5. How worried would you be about what a doctor or nurse thought if you disclosed negative emotions?</b> |            |               |            |            |                  |     |
|                                                                                                             | Not at all | 243<br>(38.5) | 122 (37.1) | 121 (40.1) | 1.8 <sub>4</sub> | .77 |
|                                                                                                             | Slightly   | 192<br>(30.4) | 100 (30.4) | 92 (30.5)  |                  |     |
|                                                                                                             | Somewhat   | 113<br>(17.9) | 65 (19.8)  | 48 (15.9)  |                  |     |
|                                                                                                             | Moderately | 64 (10.1)     | 32 (9.7)   | 32 (10.6)  |                  |     |
|                                                                                                             | Very       | 19 (3.0)      | 10 (3.0)   | 9 (3.0)    |                  |     |
| <b>6. How helpful would it be to you to talk about a personal problem to a doctor or nurse?</b>             |            |               |            |            |                  |     |
|                                                                                                             | Not at all | 47 (7.4)      | 20 (6.1)   | 27 (8.9)   | 2.4 <sub>4</sub> | .66 |
|                                                                                                             | Slightly   | 99 (15.7)     | 54 (16.4)  | 45 (14.9)  |                  |     |

|                                                                                                                                   |            |               |           |           |                  |     |
|-----------------------------------------------------------------------------------------------------------------------------------|------------|---------------|-----------|-----------|------------------|-----|
|                                                                                                                                   | Somewhat   | 147<br>(23.3) | 79 (24.0) | 68 (22.5) |                  |     |
|                                                                                                                                   | Moderately | 172<br>(27.3) | 87 (26.4) | 85 (28.1) |                  |     |
|                                                                                                                                   | Very       | 166<br>(26.3) | 89 (27.1) | 77 (25.5) |                  |     |
| <b>7. Would you feel better if you talked about feelings of sadness or anxiety to a doctor or nurse?</b>                          |            |               |           |           |                  |     |
|                                                                                                                                   | Not at all | 54 (8.6)      | 28 (8.5)  | 26 (8.6)  | 5.3 <sub>4</sub> | .26 |
|                                                                                                                                   | Slightly   | 108<br>(17.1) | 46 (14.0) | 62 (20.5) |                  |     |
|                                                                                                                                   | Somewhat   | 154<br>(24.4) | 87 (26.4) | 67 (22.2) |                  |     |
|                                                                                                                                   | Moderately | 171<br>(27.1) | 91 (27.7) | 80 (26.5) |                  |     |
|                                                                                                                                   | Very       | 144<br>(22.8) | 77 (23.4) | 67 (22.2) |                  |     |
| <b>8. How likely would you be to get a useful response if you disclosed an emotional problem you have with a doctor or nurse?</b> |            |               |           |           |                  |     |

|  |            |               |            |           |                  |     |
|--|------------|---------------|------------|-----------|------------------|-----|
|  | Not at all | 33 (5.2)      | 19 (5.8)   | 14 (4.6)  | 2.7 <sub>4</sub> | .61 |
|  | Slightly   | 77 (12.2)     | 34 (10.3)  | 43 (14.2) |                  |     |
|  | Somewhat   | 203<br>(32.2) | 110 (33.4) | 93 (30.8) |                  |     |
|  | Moderately | 176<br>(27.9) | 92 (28.0)  | 84 (27.8) |                  |     |
|  | Very       | 142<br>(22.5) | 74 (22.5)  | 68 (22.5) |                  |     |

<sup>a</sup>Risk subscale items include 1, 2, 4, and 5; Utility (benefit) subscale items include 3, 6, 7, and 8.

<sup>b</sup>Total sample missing data=9 (Group 1: Paper-based screening=6; Group 2: E-screening=3).
